# Supplementary material for: iGlarLixi Reduces Glycated Hemoglobin to a Greater Extent Than Basal Insulin Regardless of Levels at Screening: Post Hoc Analysis of LixiLan-L
Source: Springer Nature journal article supplement (doi:10.1007/s13300-017-0336-6), 2017-11-16
Supplement: MOESM1 [file 15230936]

## SUPPLEMENTARY MATERIAL

**Table S1** Rescue therapy threshold values during the 30-week treatment period

| Treatment period (week) | Threshold values         |                   |
|-------------------------|--------------------------|-------------------|
|                         | FPG                      | HbA <sub>1c</sub> |
| ≥8 to <12               | >240 mg/dL (13.3 mmol/L) | N/A               |
| ≥12 to ≤30              | >200 mg/dL (11.1 mmol/L) | >8%               |

'N/A' indicates that HbA<sub>1c</sub> was not used as a threshold value at the designated treatment period

*FPG* fasting plasma glucose, *HbA<sub>1c</sub>* glycated hemoglobin
